# Supplementary material for: Dental derived stem cell conditioned media for hair growth stimulation
Source: PubMed Central journal article supplement (PMC6493760; doi:10.1371/journal.pone.0216003), 2019-05-01
Supplement: pone.0216003.s002.pdf [file pone.0216003.s002.pdf]

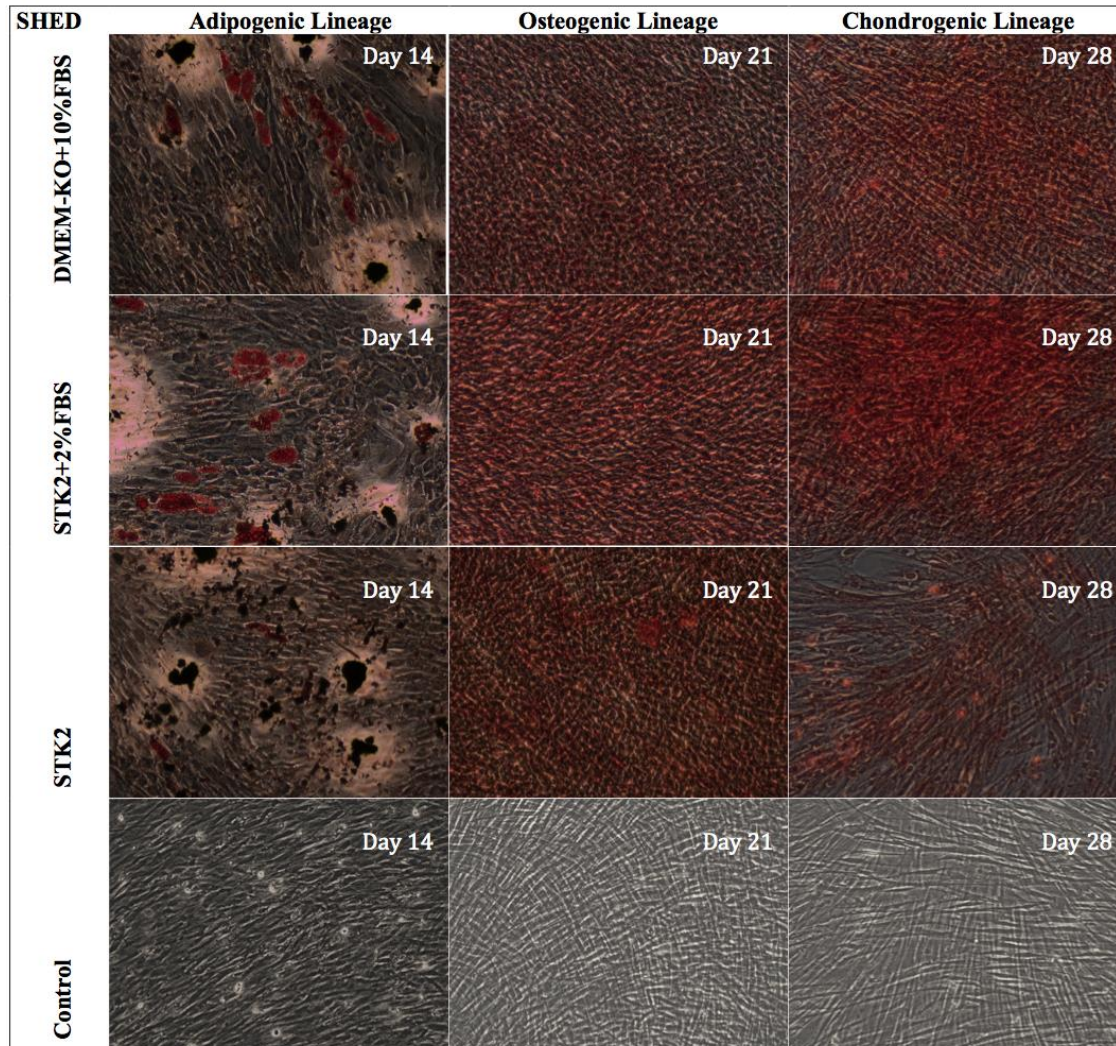

**S2 Fig Tri-lineage differentiation of SHED.** The trilineage differentiation studies conducted to study the maintenance of MSC lineages; adipogenic, chondrogenic and osteogenic for SHED when cultured in media combinations; DMEM-KO+10% FBS, STK2+2% FBS and STK2. The representative images of cells cultured in DMEM-KO+10% FBS as the control media. The study was carried out for the cells at passage 3 upon 80% confluency
