# Supplementary material for: Dental derived stem cell conditioned media for hair growth stimulation
Source: PubMed Central journal article supplement (PMC6493760; doi:10.1371/journal.pone.0216003), 2019-05-01
Supplement: pone.0216003.s004.pdf [file pone.0216003.s004.pdf]

| Event                  | SHED                                                                                        |                                                                                             |                                                                                             |                                                                                             |                                                                                             |                                                                                             |                                                                                              |                                                                                               |                                                                                               |
|------------------------|---------------------------------------------------------------------------------------------|---------------------------------------------------------------------------------------------|---------------------------------------------------------------------------------------------|---------------------------------------------------------------------------------------------|---------------------------------------------------------------------------------------------|---------------------------------------------------------------------------------------------|----------------------------------------------------------------------------------------------|-----------------------------------------------------------------------------------------------|-----------------------------------------------------------------------------------------------|
|                        | Donor 1                                                                                     |                                                                                             |                                                                                             | Donor 2                                                                                     |                                                                                             |                                                                                             | Donor 3                                                                                      |                                                                                               |                                                                                               |
|                        | Mouse 1                                                                                     | Mouse 2                                                                                     | Mouse 3                                                                                     | Mouse 1                                                                                     | Mouse 2                                                                                     | Mouse 3                                                                                     | Mouse 1                                                                                      | Mouse 2                                                                                       | Mouse 3                                                                                       |
| Display of Dark Patch  | <br>Day 12 | <br>Day 12 | <br>Day 12 | <br>Day 08 | <br>Day 08 | <br>Day 08 | <br>Day 12 | <br>Day 12 | <br>Day 12 |
| Almost Cover with Hair | <br>Day 42 | <br>Day 52 | <br>Day 60 | <br>Day 26 | <br>Day 42 | <br>Day 26 | <br>Day 34 | <br>Day 34 | <br>Day 38 |

| Event                  | HFSC                                                                                          |                                                                                               |                                                                                               |                                                                                               |                                                                                               |                                                                                               |                                                                                                |                                                                                                 |                                                                                                 |
|------------------------|-----------------------------------------------------------------------------------------------|-----------------------------------------------------------------------------------------------|-----------------------------------------------------------------------------------------------|-----------------------------------------------------------------------------------------------|-----------------------------------------------------------------------------------------------|-----------------------------------------------------------------------------------------------|------------------------------------------------------------------------------------------------|-------------------------------------------------------------------------------------------------|-------------------------------------------------------------------------------------------------|
|                        | Donor 1                                                                                       |                                                                                               |                                                                                               | Donor 2                                                                                       |                                                                                               |                                                                                               | Donor 3                                                                                        |                                                                                                 |                                                                                                 |
|                        | Mouse 1                                                                                       | Mouse 2                                                                                       | Mouse 3                                                                                       | Mouse 1                                                                                       | Mouse 2                                                                                       | Mouse 3                                                                                       | Mouse 1                                                                                        | Mouse 2                                                                                         | Mouse 3                                                                                         |
| Display of Dark Patch  | <br>Day 12  | <br>Day 12  | <br>Day 12  | <br>Day 12  | <br>Day 12  | <br>Day 12  | <br>Day 12  | <br>Day 16  | <br>Day 18  |
| Almost Cover with Hair | <br>Day 26 | <br>Day 26 | <br>Day 26 | <br>Day 26 | <br>Day 26 | <br>Day 30 | <br>Day 30 | <br>Day 42 | <br>Day 60 |

**S4 Fig Pictorial representation for the appearance of dark patches and almost complete coverage with newly grown hair.** The photographs of the telogen synchronized 7 week old female C3H/HeN mice following the subcutaneous injection of 100 $\mu$ l of SHED-CM (n=9) and HFSC-CM (n=9) administered at three day intervals for three days, for the observation of dark patches and almost complete coverage with newly grown hair
