# Supplementary material for: Dental derived stem cell conditioned media for hair growth stimulation
Source: PubMed Central journal article supplement (PMC6493760; doi:10.1371/journal.pone.0216003), 2019-05-01
Supplement: pone.0216003.s005.pdf [file pone.0216003.s005.pdf]

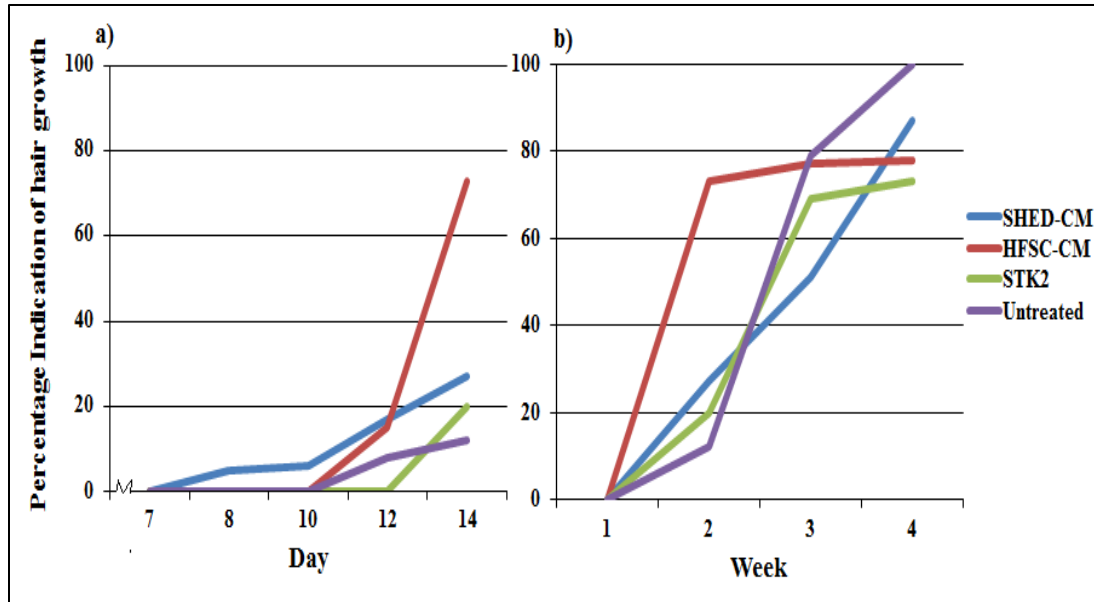

**S5 Fig Percentage indication of hair growth.** (a) The percentage of hair growth from Day 7- Day 14, following three subcutaneous injections of 100  $\mu$ l of SHED-CM (n=9), HFSC-CM (n=9), STK2 (n=3) at three-day intervals to the C3H/HeN mice and the percentage indication of hair growth for the untreated C3H/HeN mice (n=2) (b) Weekly progress of the percentage of hair growth following three subcutaneous injections of 100  $\mu$ l of SHED-CM (n=9), HFSC-CM (n=9), STK2 (n=3) at three-day intervals to the C3H/HeN mice and the percentage of hair growth for the untreated C3H/HeN mice (n=2)
