# Supplementary material for: Dental derived stem cell conditioned media for hair growth stimulation
Source: PubMed Central journal article supplement (PMC6493760; doi:10.1371/journal.pone.0216003), 2019-05-01
Supplement: pone.0216003.s006.pdf [file pone.0216003.s006.pdf]

| Media           | Positive markers |        |        | Negative marker cocktail  |
|-----------------|------------------|--------|--------|---------------------------|
|                 | CD 90            | CD 105 | CD 73  | CD 45, CD 34, CD14, CD 20 |
| DMEM-KO+10% FBS | 94.40%           | 97.95% | 99.85% | 4.79%                     |
| STK2+2% FBS     | 99.20%           | 99.60% | 99.87% | 12.82%                    |
| STK2            | 99.09%           | 99.28% | 99.71% | 6.19%                     |

**S1 Table Flowcytometry analysis of SHED.** The positive and negative MSC marker expression of SHED when cultured in media combinations; DMEM-KO+10% FBS, STK2+2% FBS and STK2. The analysis was carried out for the cells at passage 3 upon 80% confluency. The cells were stained by MSC Phenotyping cocktail, Human (MACS, Miltenyi Biotech)
