# Supplementary material for: Dental derived stem cell conditioned media for hair growth stimulation
Source: PubMed Central journal article supplement (PMC6493760; doi:10.1371/journal.pone.0216003), 2019-05-01
Supplement: pone.0216003.s008.pdf [file pone.0216003.s008.pdf]

**S1 Dataset.** Data sets used to reach the conclusions drawn in the manuscript.

**Fig 2: The population doubling times and viability of SHED and HFSCs cultured in the different media combinations from passage 2 to passage 5**

| HFSC           |         |    | SHED           |         |    |
|----------------|---------|----|----------------|---------|----|
| PDT (Hours)    |         |    | PDT(Hours)     |         |    |
| Passage 2      | Average | SE | Passage 2      | Average | SE |
| DMEM-KO+10%FBS | 105     | 30 | DMEM-KO+10%FBS | 30      | 5  |
| STK2+2%FBS     | 63      | 6  | STK2+2%FBS     | 23      | 1  |
| STK2           | 120     | 8  | STK2           | 24      | 1  |
| Passage 3      | Average | SE | Passage 3      | Average | SE |
| DMEM-KO+10%FBS | 44      | 3  | DMEM-KO+10%FBS | 43      | 5  |
| STK2+2%FBS     | 23      | 3  | STK2+2%FBS     | 19      | 7  |
| STK2           | 29      | 4  | STK2           | 27      | 6  |
| Passage 4      | Average | SE | Passage 4      | Average | SE |
| DMEM-KO+10%FBS | 58      | 5  | DMEM-KO+10%FBS | 46      | 18 |
| STK2+2%FBS     | 24      | 4  | STK2+2%FBS     | 18      | 5  |
| STK2           | 37      | 6  | STK2           | 26      | 2  |
| Passage 5      | Average | SE | Passage 5      | Average | SE |
| DMEM-KO+10%FBS | 110     | 39 | DMEM-KO+10%FBS | 58      | 3  |
| STK2+2%FBS     | 26      | 4  | STK2+2%FBS     | 33      | 12 |
| STK2           | 53      | 6  | STK2           | 39      | 14 |

  

| HFSC                 |         |    | SHED                 |         |    |
|----------------------|---------|----|----------------------|---------|----|
| Percentage Viability |         |    | Percentage Viability |         |    |
| Passage 2            | Average | SE | Passage 2            | Average | SE |
| DMEM-KO+10%FBS       | 94      | 2  | DMEM-KO+10%FBS       | 97      | 0  |
| STK2+2%FBS           | 93      | 3  | STK2+2%FBS           | 97      | 2  |
| STK2                 | 93      | 1  | STK2                 | 95      | 1  |
| Passage 3            | Average | SE | Passage 3            | Average | SE |
| DMEM-KO+10%FBS       | 94      | 0  | DMEM-KO+10%FBS       | 97      | 0  |
| STK2+2%FBS           | 95      | 2  | STK2+2%FBS           | 94      | 2  |
| STK2                 | 93      | 2  | STK2                 | 96      | 1  |
| Passage 4            | Average | SE | Passage 4            | Average | SE |
| DMEM-KO+10%FBS       | 90      | 1  | DMEM-KO+10%FBS       | 94      | 2  |
| STK2+2%FBS           | 96      | 2  | STK2+2%FBS           | 96      | 1  |
| STK2                 | 94      | 2  | STK2                 | 97      | 1  |
| Passage 5            | Average | SE | Passage 5            | Average | SE |
| DMEM-KO+10%FBS       | 93      | 2  | DMEM-KO+10%FBS       | 89      | 6  |
| STK2+2%FBS           | 96      | 2  | STK2+2%FBS           | 92      | 2  |
| STK2                 | 93      | 1  | STK2                 | 88      | 3  |

**Fig 4 Percentage of hair follicles at each hair growth stage on day 1 and day 3, post CM treatment under in vitro conditions**

**Percentage of HFs in different growth stages**

| SHED_CM     |       | Early Anagen | Mid Anagen | Late Anagen | Catogen | Telogen |
|-------------|-------|--------------|------------|-------------|---------|---------|
| DMEM+10%FBS | D1    | 75           | 0          | 0           | 4       | 21      |
| DMEM+10%FBS | D3    | 70           | 3          | 0           | 19      | 8       |
| DMEM+10%FBS | P3 D1 | 88           | 0          | 0           | 8       | 4       |
| DMEM+10%FBS | P3 D3 | 63           | 0          | 0           | 5       | 33      |
| DMEM+10%FBS | P4 D1 | 0            | 0          | 0           | 0       | 0       |
| DMEM+10%FBS | P4 D3 | 81           | 0          | 0           | 2       | 17      |
| STK2+2%FBS  | D1    | 81           | 0          | 0           | 1       | 17      |
| STK2+2%FBS  | D3    | 83           | 0          | 0           | 6       | 11      |
| STK2+2%FBS  | P3 D1 | 0            | 0          | 0           | 0       | 0       |
| STK2+2%FBS  | P3 D3 | 57           | 0          | 0           | 0       | 43      |
| STK2+2%FBS  | P4 D1 | 0            | 0          | 0           | 0       | 0       |
| STK2+2%FBS  | P4 D3 | 70           | 0          | 0           | 2       | 28      |
| STK2        | D1    | 46           | 32         | 0           | 3       | 19      |
| STK2        | D3    | 62           | 0          | 0           | 4       | 35      |
| STK2        | P3 D1 | 44           | 0          | 0           | 11      | 44      |
| STK2        | P3 D3 | 91           | 0          | 0           | 0       | 9       |
| STK2        | P4 D1 | 100          | 0          | 0           | 0       | 0       |
| STK2        | P4 D3 | 75           | 0          | 0           | 0       | 25      |

**Percentage of HFs in different growth stages**

| HFSC_CM     |       | Early Anagen | Mid Anagen | Late Anagen | Catogen | Telogen |
|-------------|-------|--------------|------------|-------------|---------|---------|
| DMEM+10%FBS | D1    | 75           | 0          | 0           | 4       | 21      |
| DMEM+10%FBS | D3    | 70           | 3          | 0           | 19      | 8       |
| DMEM+10%FBS | P3 D1 | 83           | 13         | 0           | 0       | 4       |
| DMEM+10%FBS | P3 D3 | 83           | 4          | 0           | 0       | 13      |
| DMEM+10%FBS | P4 D1 | 0            | 0          | 0           | 0       | 0       |
| DMEM+10%FBS | P4 D3 | 49           | 38         | 0           | 0       | 14      |
| STK2+2%FBS  | D1    | 81           | 0          | 0           | 1       | 17      |
| STK2+2%FBS  | D3    | 83           | 0          | 0           | 6       | 11      |
| STK2+2%FBS  | P3 D1 | 29           | 0          | 0           | 0       | 71      |
| STK2+2%FBS  | P3 D3 | 57           | 2          | 0           | 3       | 38      |
| STK2+2%FBS  | P4 D1 | 100          | 0          | 0           | 0       | 0       |
| STK2+2%FBS  | P4 D3 | 75           | 25         | 0           | 0       | 0       |
| STK2        | D1    | 46           | 32         | 0           | 3       | 19      |

|      |       |    |   |   |   |    |
|------|-------|----|---|---|---|----|
| STK2 | D3    | 62 | 0 | 0 | 4 | 35 |
| STK2 | P3 D1 | 45 | 5 | 0 | 0 | 50 |
| STK2 | P3 D3 | 82 | 3 | 0 | 0 | 15 |
| STK2 | P4 D1 | 71 | 5 | 0 | 7 | 17 |
| STK2 | P4 D3 | 67 | 3 | 0 | 7 | 23 |

**Fig 5 Number of days taken for the appearance of dark patches and almost complete hair coverage with the corresponding paracrine factor profiling of the CM prepared in STK2-serum free media.**

|                 | Appearance of Dark Patches |    | Almost Complete coverage of hair growth |    |
|-----------------|----------------------------|----|-----------------------------------------|----|
|                 | Average No of Days         | SD | Average Days                            | SD |
| Donor 1 SHED-CM | 12                         | 0  | 51                                      | 9  |
| Donor 2 SHED-CM | 8                          | 0  | 31                                      | 9  |
| Donor 3 SHED-CM | 12                         | 0  | 35                                      | 2  |
| Donor 1 HFSC-CM | 12                         | 0  | 26                                      | 0  |
| Donor 2 HFSC-CM | 15                         | 3  | 44                                      | 15 |
| Donor 3 HFSC-CM | 12                         | 0  | 27                                      | 2  |
| STK2            | 15                         | 1  | 35                                      | 15 |
| Untreated       | 14                         | 0  | 32                                      | 8  |

**Fig 6 Time duration taken for the appearance of dark patches and almost complete coverage of hair upon treatment with SHED-CM and HFSC-CM**

|      | Appearance of Dark Patches |    | Almost Complete coverage of hair growth |    |
|------|----------------------------|----|-----------------------------------------|----|
|      | Day                        | SD | Day                                     | SD |
| SHED | 11                         | 2  | 39                                      | 11 |
| HFSC | 13                         | 2  | 32                                      | 12 |

**S5 Fig Percentage indication of hair growth.**

| SLED-CM | Total area | Clear area       | Dark patched area | Area with hair | % Clear area | % Dark patched area | % Hair area | % Indication of hair growth |
|---------|------------|------------------|-------------------|----------------|--------------|---------------------|-------------|-----------------------------|
|         |            | Completely clear |                   |                |              |                     |             | 0%                          |
| Day 7   |            | Completely clear |                   |                |              |                     |             | 0%                          |
| Day 8   | 4195221    | 3995899          | 199323            | 0              | 95%          | 5%                  | 0%          | 5%                          |
| Day 10  | 4344233    | 4063567          | 214627            | 66039          | 94%          | 5%                  | 2%          | 6%                          |
| Day 12  | 4926098    | 4173279          | 481843            | 332712         | 85%          | 10%                 | 7%          | 17%                         |
| Week 2  | 6640213    | 4969778          | 1001713           | 823187         | 75%          | 15%                 | 12%         | 27%                         |
| Week 3  | 8336310    | 4046432          | 1785502           | 2504376        | 49%          | 21%                 | 30%         | 51%                         |
| Week 4  | 7470538    | 971670           | 1576492           | 4922376        | 13%          | 21%                 | 66%         | 87%                         |

| HFSC-CM | Total area | Clear area       | Dark patched area | Area with hair | % Clear area | % Dark patched area | % Hair area | % Indication of hair growth |
|---------|------------|------------------|-------------------|----------------|--------------|---------------------|-------------|-----------------------------|
| Day 7   |            | Completely clear |                   |                |              |                     |             | 0%                          |
| Day 8   |            | Completely clear |                   |                |              |                     |             | 0%                          |
| Day 10  |            | Completely clear |                   |                |              |                     |             | 0%                          |
| Day 12  | 4998570    | 3248198          | 637528            | 115242         | 65%          | 13%                 | 2%          | 15%                         |
| Week 2  | 11844828   | 3208479          | 7916440           | 719507         | 27%          | 67%                 | 6%          | 73%                         |
| Week 3  | 8353515    | 1945396          | 982169            | 5425950        | 23%          | 12%                 | 65%         | 77%                         |
| Week 4  | 5238832    | 1140177          | 67990             | 4030665        | 22%          | 1%                  | 77%         | 78%                         |

| STK2   | Total area | Clear area       | Dark patched area | Area with hair | % Clear area | % Dark patched area | % Hair area | % Indication of hair growth |
|--------|------------|------------------|-------------------|----------------|--------------|---------------------|-------------|-----------------------------|
| Day 7  |            | Completely clear |                   |                |              |                     |             | 0%                          |
| Day 8  |            | Completely clear |                   |                |              |                     |             | 0%                          |
| Day 10 |            | Completely clear |                   |                |              |                     |             | 0%                          |
| Day 12 |            | Completely clear |                   |                |              |                     |             | 0%                          |
| Week 2 | 5194099    | 4139344          | 296345            | 757891         | 80%          | 6%                  | 15%         | 20%                         |
| Week 3 | 7930445    | 2436514          | 1844873           | 3634205        | 31%          | 23%                 | 46%         | 69%                         |
| Week 4 | 6792523    | 1848720          | 0                 | 4928950        | 27%          | 0%                  | 73%         | 73%                         |

| Untreated | Total area | Clear area       | Dark patched area | Area with hair | % Clear area | % Dark patched area | % Hair area | % Indication of hair growth |
|-----------|------------|------------------|-------------------|----------------|--------------|---------------------|-------------|-----------------------------|
| Day 7     |            | Completely clear |                   |                |              |                     |             | 0%                          |
| Day 8     |            | Completely clear |                   |                |              |                     |             | 0%                          |
| Day 10    |            | Completely clear |                   |                |              |                     |             | 0%                          |
| Day 12    | 3353500    | 3097629          | 180995            | 74876          | 92%          | 5%                  | 2%          | 8%                          |
| Week 2    | 4999061    | 4418673          | 159493            | 420895         | 88%          | 3%                  | 8%          | 12%                         |
| Week 3    | 4957191    | 1056280          | 1851420           | 2049491        | 21%          | 37%                 | 41%         | 79%                         |
