# Supplementary material for: Dental derived stem cell conditioned media for hair growth stimulation
Source: PLoS One. 2019 May 1;14(5):e0216003. doi: 10.1371/journal.pone.0216003 (PMC6493760; doi:10.1371/journal.pone.0216003)
Supplement: S1 Fig — (a) Score chart for the determination of murine hair growth stage adapted from Muller Rover et al. 2001. (b) The representative photomicrographs of the hair follicle indicating the different hair growth stages, identified based on the position of the hair follicle, consistency and shape of the dermal papilla and the presence and absence of the inner root sheath (Original Magnification 40× and stained with H&E staining). (PDF) [file pone.0216003.s001.pdf]

| (a)          | Position of Hair Follicle |                  |                                   |                   |                                   | Consistency of Dermal Papilla |          | Shape of Dermal Papilla |       |        | Inner Root Sheath |                       |                    |                 |                 |
|--------------|---------------------------|------------------|-----------------------------------|-------------------|-----------------------------------|-------------------------------|----------|-------------------------|-------|--------|-------------------|-----------------------|--------------------|-----------------|-----------------|
|              | Papillary Dermis          | Reticular Dermis | Border of Dermis and Subcutaneous | Mid Sub-Cutaneous | Deep SC above Panniculus Carnosus | Consistent                    | Diffused | Ball                    | Onion | Narrow | Present           |                       |                    | Absent          |                 |
|              |                           |                  |                                   |                   |                                   |                               |          |                         |       |        | Cone              | Below Sebaceous Gland | At Sebaceous Gland | Above Germ Cell | Below Germ Cell |
| Early Anagen |                           |                  |                                   |                   |                                   |                               |          |                         |       |        |                   |                       |                    |                 |                 |
| Mid Anagen   |                           |                  |                                   |                   |                                   |                               |          |                         |       |        |                   |                       |                    |                 |                 |
| Late Anagen  |                           |                  |                                   |                   |                                   |                               |          |                         |       |        |                   |                       |                    |                 |                 |
| Catagen      |                           |                  |                                   |                   |                                   |                               |          |                         |       |        |                   |                       |                    |                 |                 |
| Telogen      |                           |                  |                                   |                   |                                   |                               |          |                         |       |        |                   |                       |                    |                 |                 |

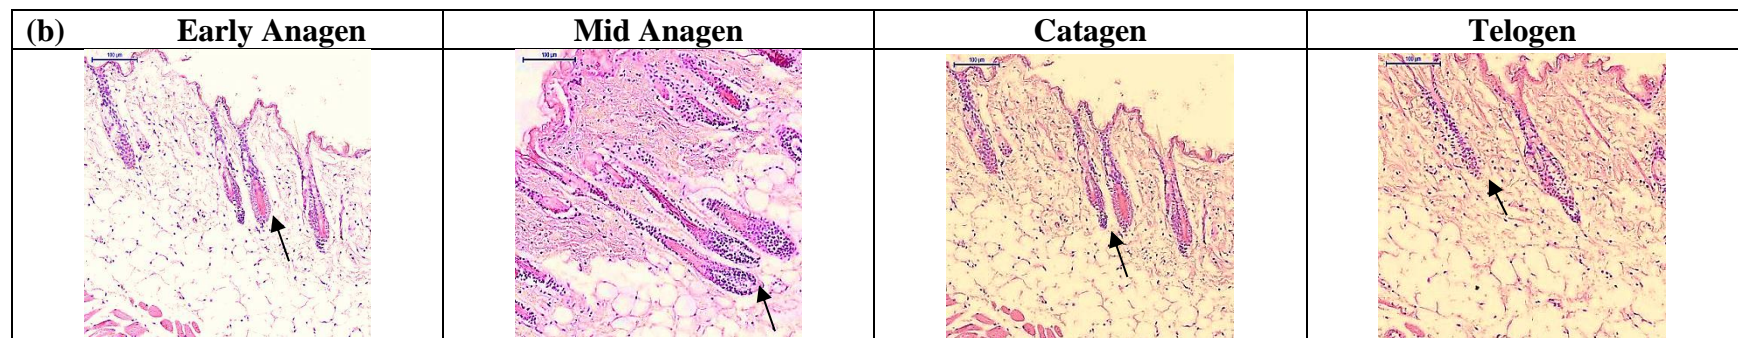

**S1 Fig. Photomicrographs to indicate the different stages of hair growth** (a) Score chart for the determination of murine hair growth stage adapted from Muller Rover et al. 2001. (b) The representative photomicrographs of the hair follicle indicating the different hair growth stages, identified based on the position of the hair follicle, consistency and shape of the dermal papilla and the presence and absence of the inner root sheath (Original Magnification 40× and stained with H&E staining)
