# Supplementary material for: Dental derived stem cell conditioned media for hair growth stimulation
Source: PLoS One. 2019 May 1;14(5):e0216003. doi: 10.1371/journal.pone.0216003 (PMC6493760; doi:10.1371/journal.pone.0216003)
Supplement: S2 Table — The positive and negative MSC marker expression of HFSCs when cultured in media combinations; DMEM-KO+10% FBS, STK2+2% FBS and STK2. The analysis was carried out for the cells at passage 3 upon 80% confluency. (PDF) [file pone.0216003.s007.pdf]

| Media           | Positive markers |        |        | Negative marker cocktail   |
|-----------------|------------------|--------|--------|----------------------------|
|                 | CD 90            | CD 105 | CD 73  | CD 45, CD 34, CD14 , CD 20 |
| DMEM-KO+10% FBS | 69.44%           | 99.02% | 98.68% | 6.03%                      |
| STK2+2% FBS     | 94.52%           | 99.67% | 99.75% | 3.00%                      |
| STK2            | 94.71%           | 98.26% | 99.53% | 0.83%                      |

**S2 Table Flowcytometry analysis of HFSCs.** The positive and negative MSC marker expression of HFSCs when cultured in media combinations; DMEM-KO+10% FBS, STK2+2% FBS and STK2. The analysis was carried out for the cells at passage 3 upon 80% confluency. The cells were stained by MSC Phenotyping cocktail, Human (MACS, Miltenyi Biotech)
